# Supplementary material for: Confocal laser endomicroscopy detects colonic inflammation in patients with irritable bowel syndrome: a prospective study
Source: PubMed Central journal article supplement — Endosc Int Open. 2020 Mar 23;8(4):E550–7. doi: 10.1055/a-1119-6327 (PMC7089800; doi:10.1055/a-1119-6327), 2020-03-23
Supplement: 1678supmat-10-1055-a-1119-6327.pdf [file 1678supmat-10-1055-a-1119-6327.pdf]

**Supplementary table 1** Cellularity in the colonic mucosa between different IBS phenotypes (n=37).

|                    | Overall (n=37) | Diarrhea-predominant IBS (n = 11) | Constipation-predominant IBS (n = 21) | Alternating-IBS (n = 5) | P value |
|--------------------|----------------|-----------------------------------|---------------------------------------|-------------------------|---------|
| <b>Neutrophils</b> | 20/37 (54.0)   | 8/11 (72.7)                       | 9/21 (42.9)                           | 3/5 (60.0)              | 0.262*  |
| <b>Eosinophils</b> | 31/37 (83.8)   | 11/11 (100)                       | 16/21 (76.2)                          | 4/5 (80.0)              | 0.215*  |
| <b>Lymphocytes</b> | 29/37 (78.8)   | 11/11 (100)                       | 14/21 (66.7)                          | 4/5 (80.0)              | 0.093*  |
| <b>Macrophages</b> | 4/37 (10.8)    | 0                                 | 4/21 (19.0)                           | 0                       | 0.182*  |

IBS, irritable bowel syndrome.

\*Chi-squared test.

**Supplementary table 2** Distribution of pCLE-findings and Geboes score in the IBS and control groups.

|                              | Overall (n = 74) | Geboes 0 (n = 11) | Geboes 1 (n = 4) | Geboes 2 (n = 37) | Geboes 3 (n = 9) | Geboes 4 (n = 13) | P value |
|------------------------------|------------------|-------------------|------------------|-------------------|------------------|-------------------|---------|
| IBS cases (n = 37)           |                  |                   |                  |                   |                  |                   |         |
| Vascularity changes          | 13               | 1                 | -                | 6                 | 1                | 5                 | 0.378*  |
| Gaps increase                | 8                | -                 | -                | 4                 | 2                | 2                 | 0.467*  |
| Fluorescein leaks            | 10               | 1                 | -                | 6                 | 0                | 3                 | 0.827*  |
| Intercrypt distance increase | 10               | -                 | -                | 7                 | 2                | 1                 | 0.743*  |
| Cellular infiltration        | 12               | -                 | 2                | 7                 | 1                | 2                 | 0.415*  |
| Healthy controls (n = 37)    |                  |                   |                  |                   |                  |                   |         |
| Vascularity changes          | 6                | 1                 | -                | 5                 | -                | -                 | 0.769*  |
| Gap increase                 | 7                | -                 | -                | 5                 | -                | 2                 | 0.081*  |
| Fluorescein leaks            | 6                | -                 | -                | 4                 | 1                | 1                 | 0.104*  |
| Intercrypt distance increase | 10               | -                 | 1                | 5                 | 3                | 1                 | 0.039*  |
| Cellular infiltration        | 9                | 1                 | 1                | 5                 | 0                | 2                 | 0.509*  |

IBS, irritable bowel syndrome; pCLE, probe-confocal laser endomicroscopy.

\*Mann–Whitney *U* test.
